# Supplementary material
Source: PubMed Central journal article supplement (PMC11028072)
Supplement: 262_2018_2212_MOESM1_ESM.pdf [file 262_2018_2212_MOESM1_ESM.pdf]

## Supplementary material

### Supplementary figure

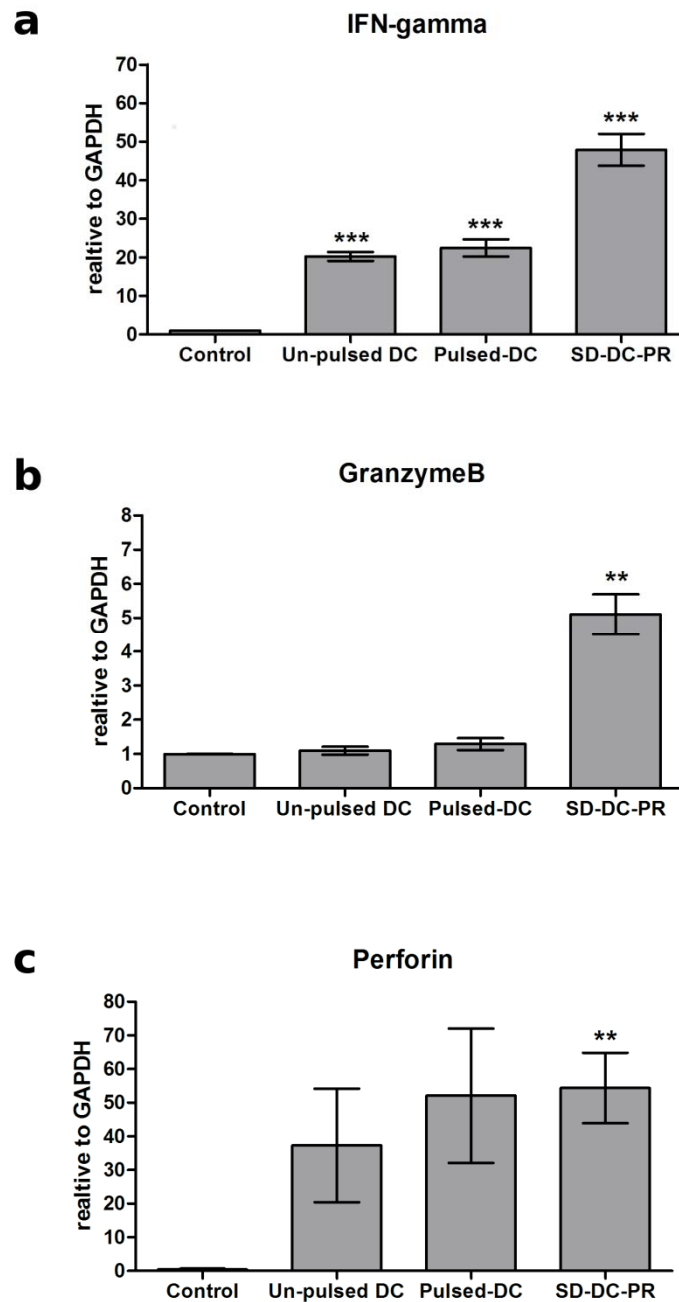

**Supplementary Fig. Expression data on IFN-gamma and perforin or granzymes.** Effector T-cells after activation for 10 days by DCs generated by different methods were determined for the expression data of (a) IFN-gamma, (b) perforin, or (c) granzymes relative to that of T-cells without activation (control).
